# Supplementary material
Source: publisher site journal article supplement (https://www.spandidos-publications.com/2740/downloadSupplementary)
Supplement: Supplementary file 1 [file downloadSupplementary]

Table SI. Baseline characteristics of patients with hepatocellular carcinoma (n=20).

| Characteristics                     | Value       |
|-------------------------------------|-------------|
| Sex, male/female                    | 18/2        |
| Mean age $\pm$ SD, years            | 53 $\pm$ 12 |
| Cirrhosis, n (%)                    | 10 (50)     |
| Child-Pugh classification, A/B/C    | 20/0/0      |
| AFP, positive/negative <sup>a</sup> | 13/7        |
| BCLC stage, A/B/C                   | 6/13/1      |

Clinical and laboratory parameters of patients by disease severity as evaluated by the Child-Pugh score. <sup>a</sup>AFP positive,  $\geq 200$  ng/ml; AFP negative,  $< 200$  ng/ml. AFP,  $\alpha$ -fetoprotein; BCLC, Barcelona-Clinic Liver Cancer.
